# Supplementary material for: Molecular basis of the attenuated phenotype of human APOBEC3B DNA mutator enzyme
Source: PubMed Central journal article supplement (PMC4627089; doi:10.1093/nar/gkv935), 2015-09-17
Supplement: supp_gkv935_nar-01816-d-2015-File006.pdf [file supp_gkv935_nar-01816-d-2015-File006.pdf]

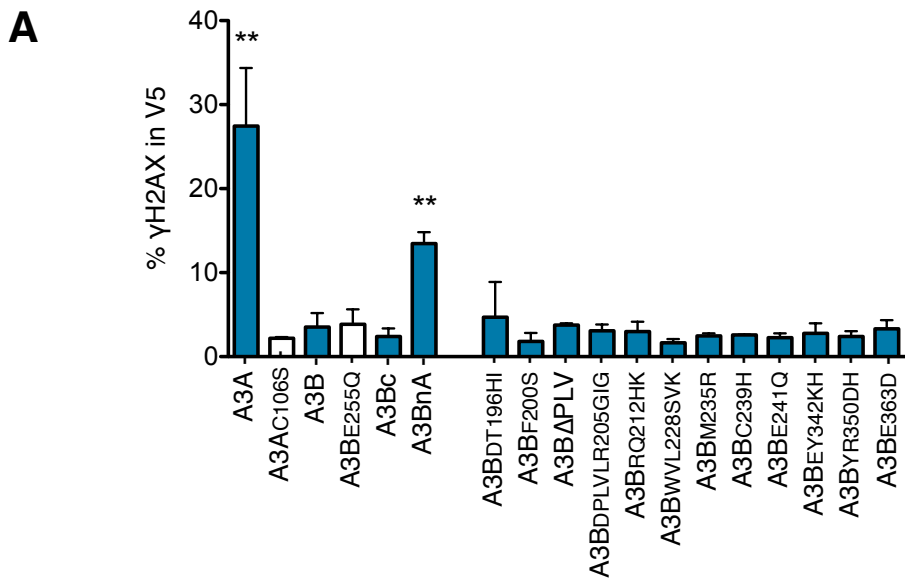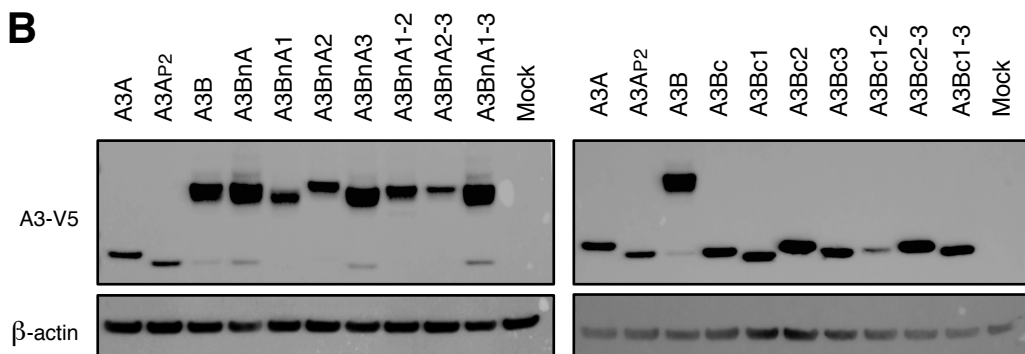

**Supplementary Figure S1 : Fluorescence-activated cell sorting analysis of  $\gamma$ H2AX-positive cells and western blot analysis of V5-tagged A3 chimeras.**

A) Fluorescence-activated cell sorting (FACS) analysis of  $\gamma$ H2AX-positive HeLa cells gated on V5-positive cells after A3B mutants transfection at 48 h. Error bars represent s.d. from four independent transfections. Differences compared with A3AC106S catalytic mutant were calculated using the Mann–Whitney test (\*\*  $p < 0.01$ ). B) Western blot analysis of V5-tagged A3 chimeras in human HEK 293T cells.  $\beta$ -Actin was used as loading control.

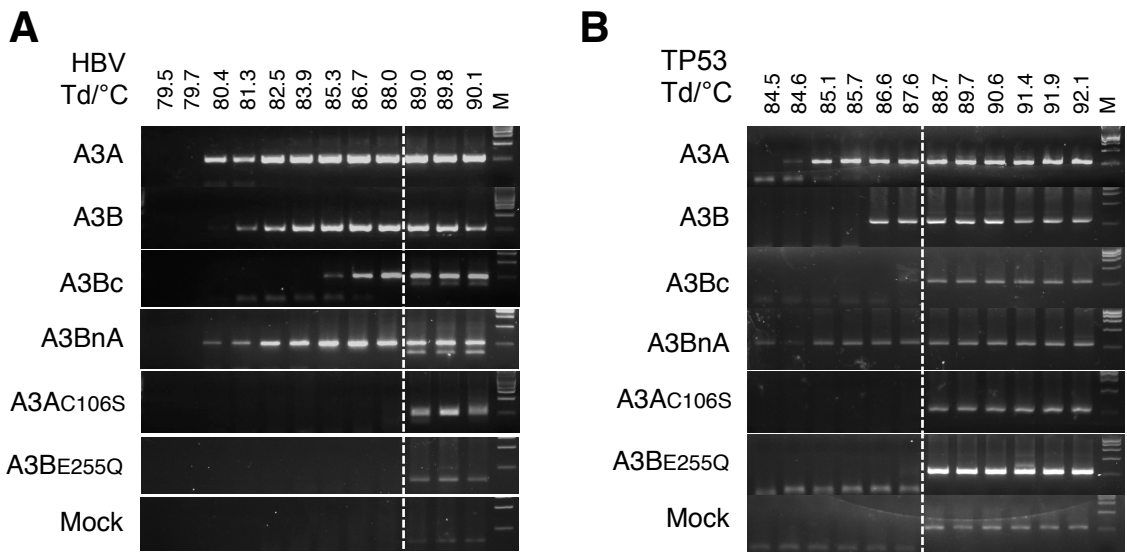

**Supplementary Figure S2. A3 editing on HBV DNA and nuclear DNA.**

A) HBV genome-specific 3DPCR gels after QT6 cells transfections with A3 coding plasmids.

B) TP53 specific 3DPCR gels after 293T-UG1 cells transfections with A3 coding plasmids.

**A**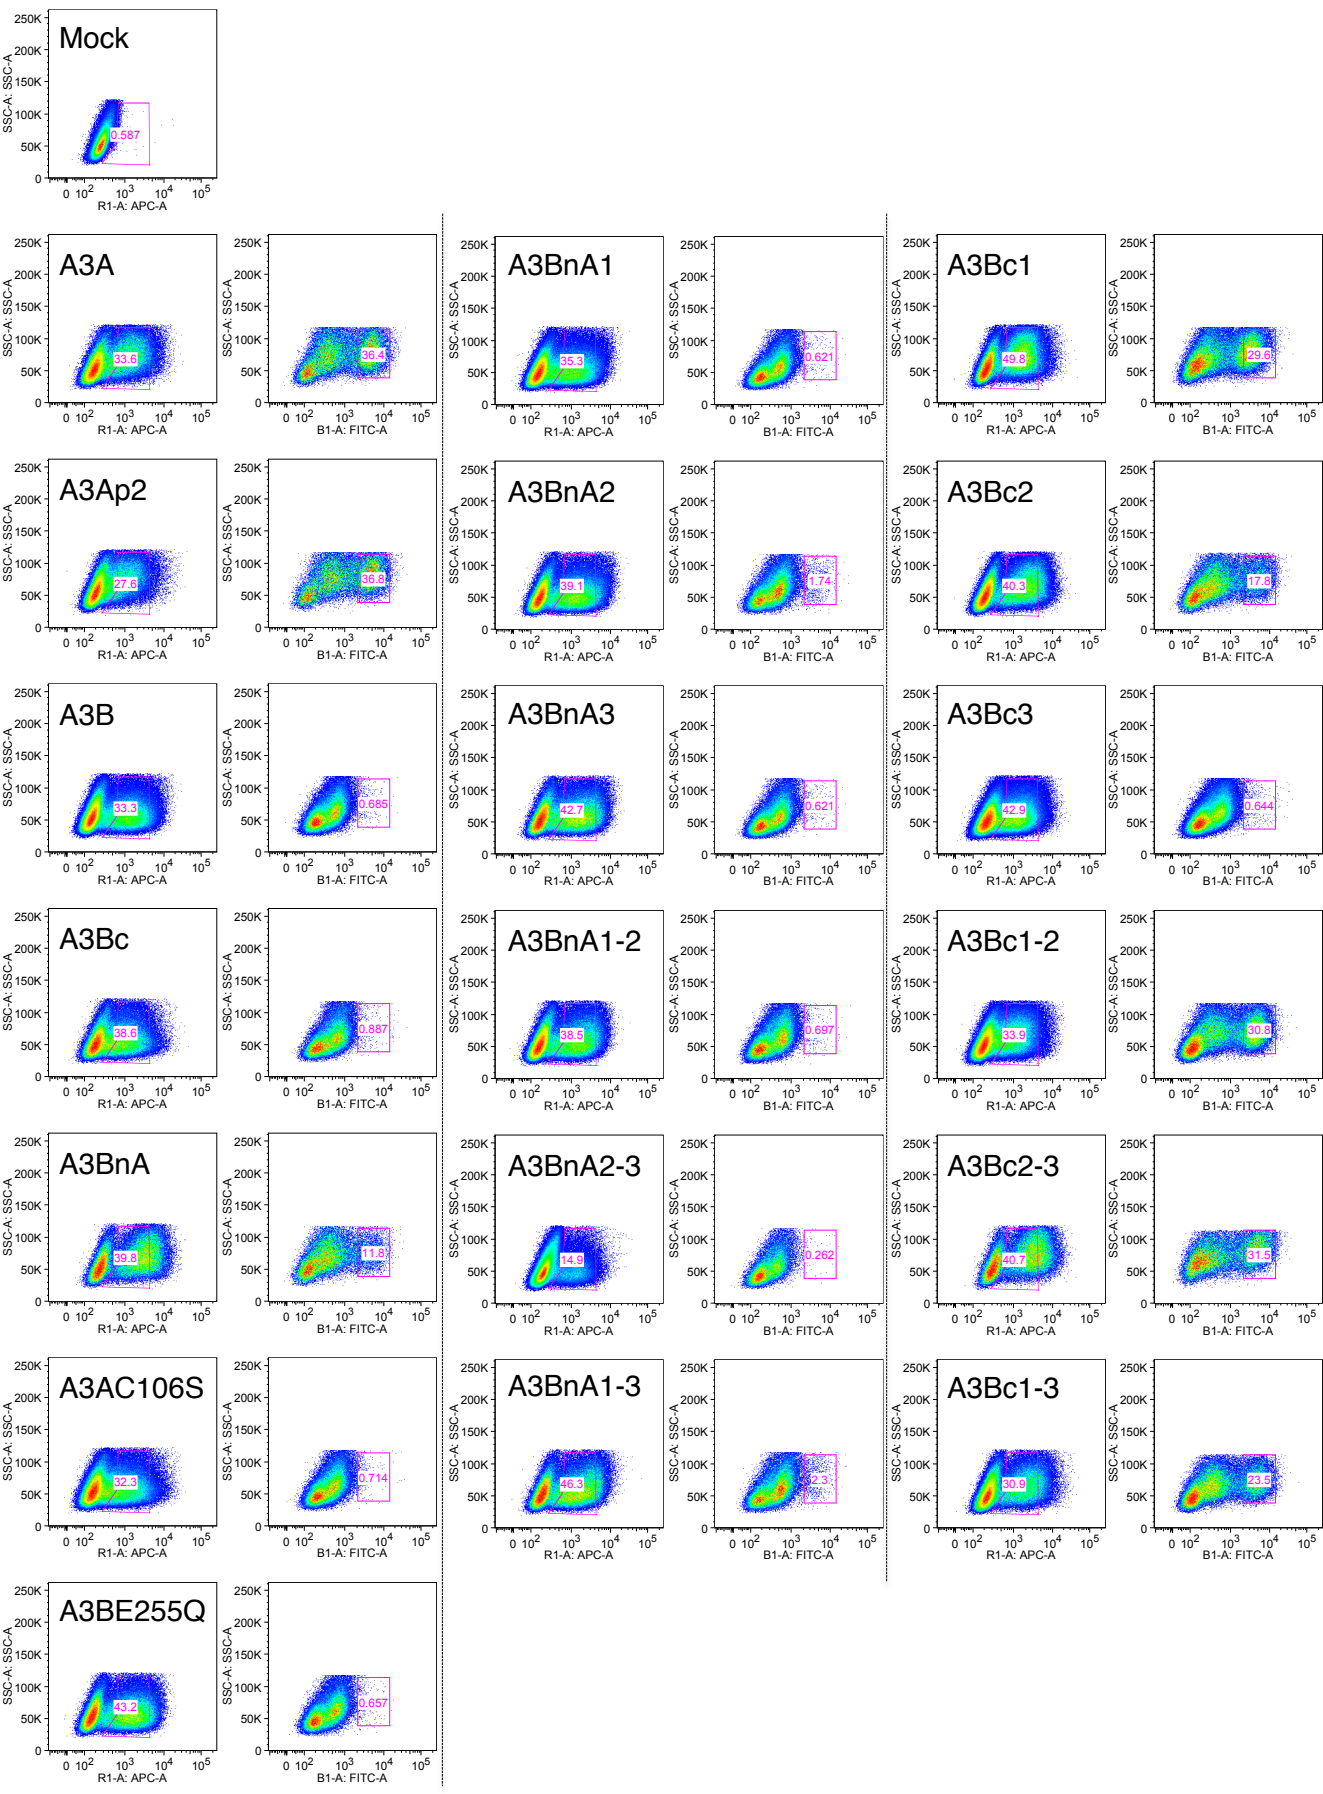

**B**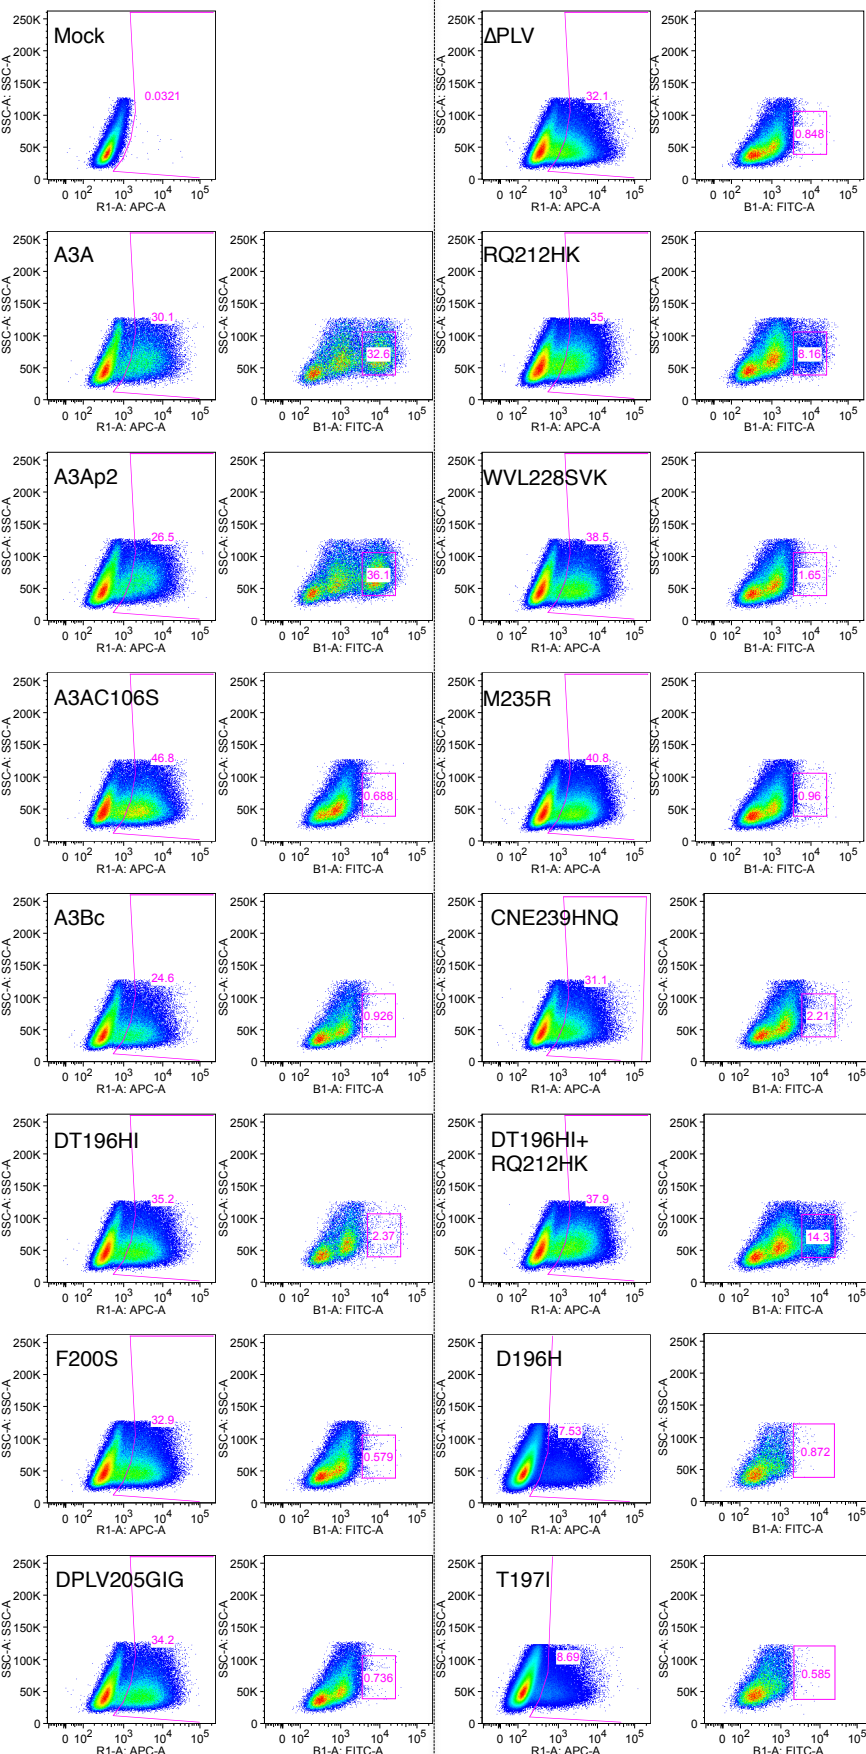**C**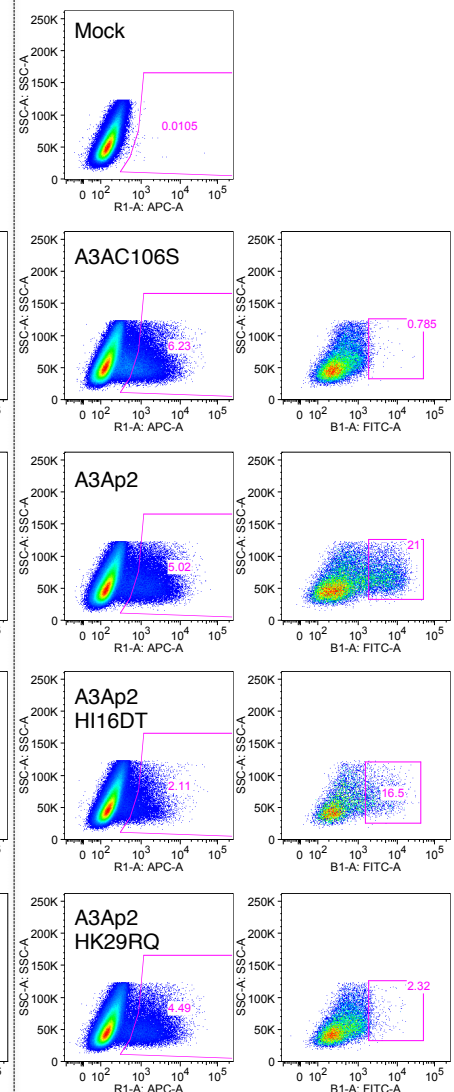

**D**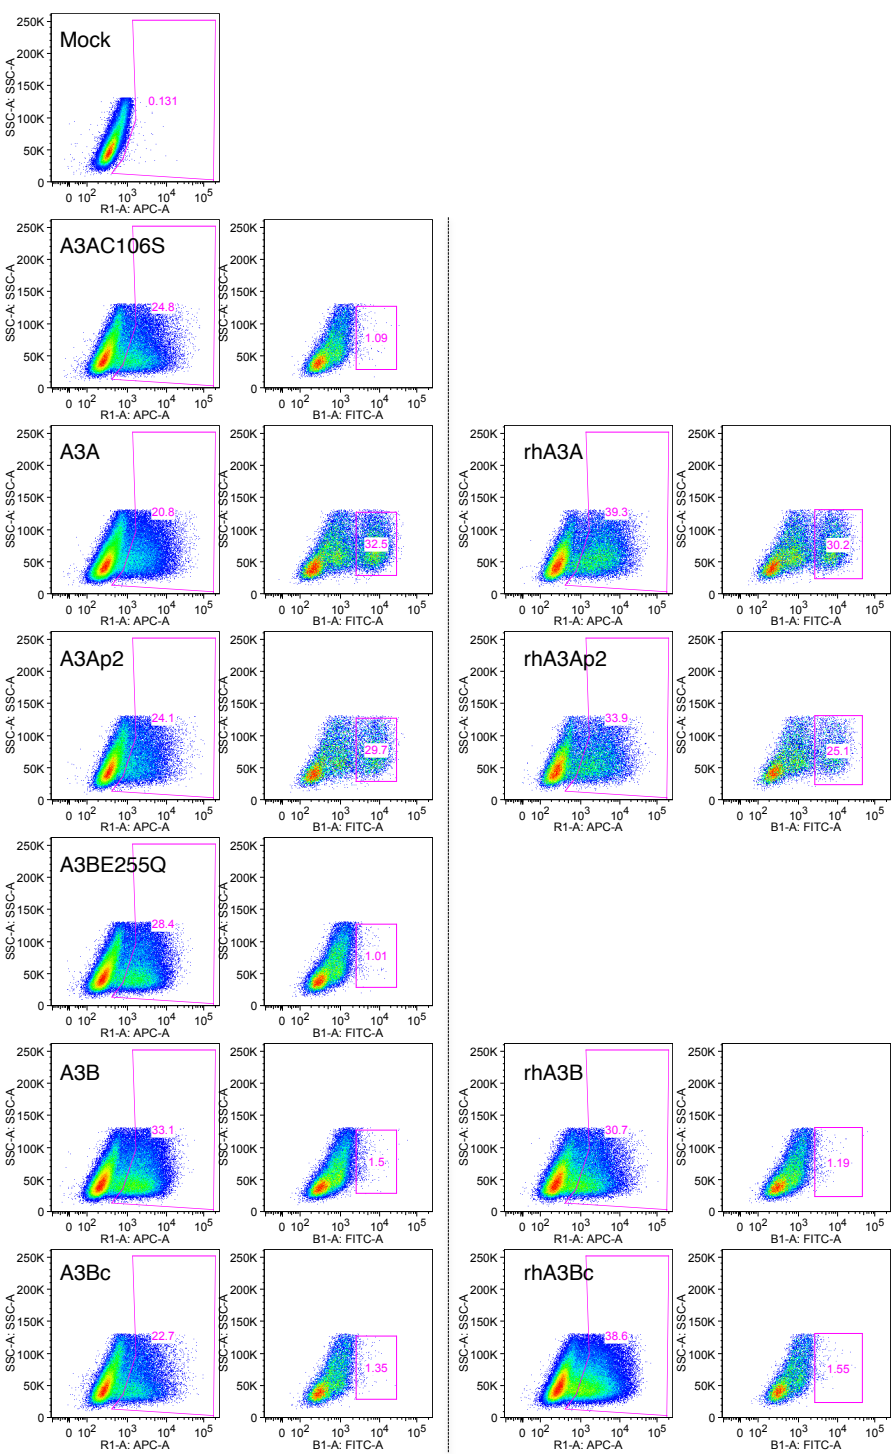

**Supplementary Figure S3 : Fluorescence-activated cell sorting analysis of Double strand breaks formation after A3 transfection.**

FACS pseudo-color plots of  $\gamma$ H2AX staining (FITC window, right panel) performed on V5 positive HeLa cells (APC window, left panel) after A3 (2  $\mu$ g) transfection at 48 hours. A3AC106S catalytic mutant transfection is used as negative control.

**A**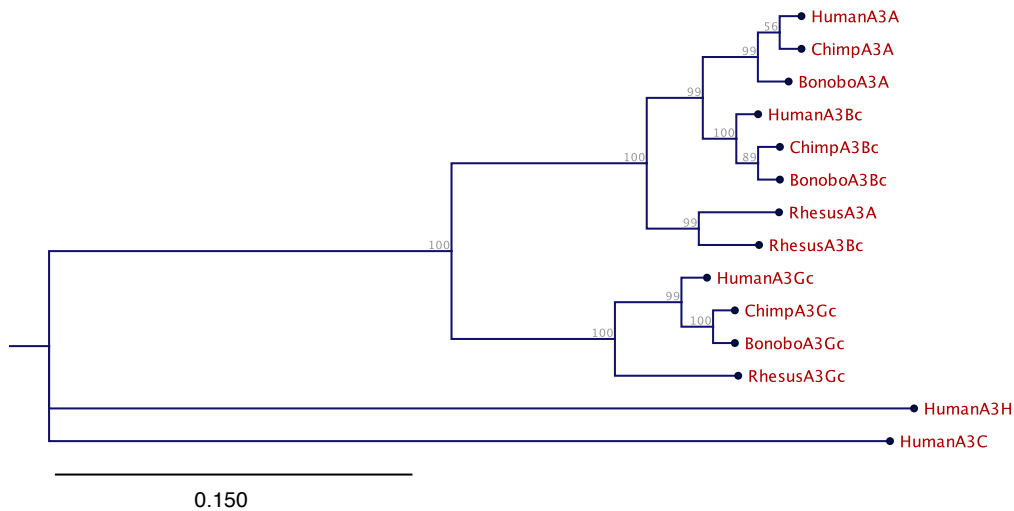**B**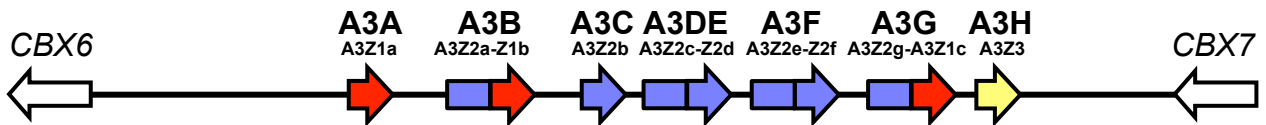

|        | A3AP2 | A3Bc | A3Gc | A3Bn | A3DEn | A3Fn | A3Gn | A3DEc | A3Fc | A3C | A3H |
|--------|-------|------|------|------|-------|------|------|-------|------|-----|-----|
| Human  | 6.5   | 4.9  | 5.9  | 7.8  | 9.0   | 8.3  | 9.4  | 7.4   | 5.7  | 7.4 | 8.6 |
| Chimp  | 6.9   | 5.0  | 6.6  | 7.1  | 9.5   | 8.6  | 9.3  | 7.2   | 5.5  | 7.9 | 8.4 |
| Bonobo | 6.6   | 5.0  | 6.5  | 6.7  | 9.5   | -    | 9.5  | 6.6   | -    | 7.7 | 8.4 |
| Gibbon | 6.7   | 5.2  | 7.3  | 6.7  | 9.5   | -    | 9.5  | 7.1   | -    | 8.2 | 9.6 |
| Rhesus | 7.1   | 4.6  | 6.1  | 7.8  | 8.6   | 8.6  | 9.3  | 6.0   | 6.2  | 7.5 | 9.9 |

Mean  $\pm$  S.D

|               |               |               |               |               |               |               |               |               |               |               |
|---------------|---------------|---------------|---------------|---------------|---------------|---------------|---------------|---------------|---------------|---------------|
| 6.8 $\pm$ 0.2 | 4.9 $\pm$ 0.2 | 6.5 $\pm$ 0.5 | 7.2 $\pm$ 0.6 | 9.2 $\pm$ 0.4 | 8.5 $\pm$ 0.2 | 9.4 $\pm$ 0.1 | 6.9 $\pm$ 0.6 | 5.8 $\pm$ 0.4 | 7.7 $\pm$ 0.3 | 9.0 $\pm$ 0.7 |
|---------------|---------------|---------------|---------------|---------------|---------------|---------------|---------------|---------------|---------------|---------------|

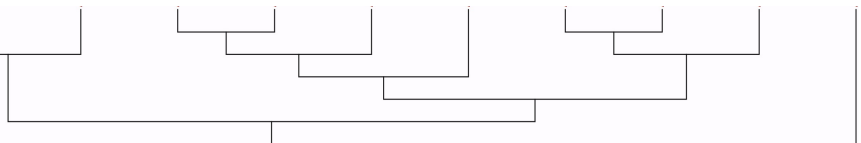

### Supplementary Figure S4.

#### Evolutionary history of A3A and A3B Z1 domain and theoretical Isolelectric point on primate A3 domains

A) Numbers correspond to bootstrap values inferred from 1,000 replicates. Evolutionary distances were computed using Poisson correction method and are expressed in numbers of substitution per site.

B) Theoretical isoelectric point (pI) performed on primate A3 domains using primary amino acid sequences. Values were rounded-off to one digit after the decimal. A3 domains are organized following human A3 domains phylogeny.

| Gene ID   | Sample 1 | Sample 2 | Sample 3 |
|-----------|----------|----------|----------|
| AID       | 0        | 0        | 1        |
| APOBEC1   | 0        | 0        | 1        |
| APOBEC2   | 1        | 2        | 2        |
| APOBEC3A  | 0        | 6        | 0        |
| APOBEC3B  | 0        | 0        | 0        |
| APOBEC3C  | 0        | 8        | 1        |
| APOBEC3DE | 0        | 6        | 0        |
| APOBEC3F  | 0        | 8        | 2        |
| APOBEC3G  | 0        | 11       | 2        |
| APOBEC3H  | 0        | 5        | 0        |
| APOBEC4   | 18       | 19       | 24       |
| PRM1      | 26539    | 69783    | 27855    |
| HPRT1     | 0        | 0        | 0        |

**Supplementary Figure S5.**

**Human polynucleotide cytidine deaminase transcriptome in purified mature human sperm.** Absolute numbers of RNAseq transcripts identified. *PRM1* is the sperm specific protamine 1 gene while *HPRT1* is known not to be expressed in sperm.
