# Supplementary material for: Molecular basis of the attenuated phenotype of human APOBEC3B DNA mutator enzyme
Source: PubMed Central journal article supplement (PMC4627089; doi:10.1093/nar/gkv935), 2015-09-17
Supplement: supp_gkv935_nar-01816-d-2015-File007.pdf [file supp_gkv935_nar-01816-d-2015-File007.pdf]

| Plasmid      | Matrix          | Primers                                                                                        |
|--------------|-----------------|------------------------------------------------------------------------------------------------|
| A3Bc         | A3Bi7           | For : 5'-CACCATGGATCCAGACACATTCACCTTCACTTCA-3'<br>Rev : 5'-GTTTCCCTGATTCTGGAGAAT-3'            |
| A3BnA        | Puc57-A3BnA     | For : 5'-CACCATGAATCCACAGATCAGAAATCCGATGGAGC-3'<br>Rev : 5'-GTTTCCCTGATTCTGGAAGAGCAGGGGGTTG-3' |
| A3BnA1       | A3BnA           | For : 5'-CACCATGAATCCACAGATCAGAAATCCG-3'<br>Rev : 5'-GCCATTGTCCAGGCGCTCCACTTCGTAGCACAG-3'      |
|              | A3Bi7           | For : 5'-CTGTGCTACGAAGTGGAGCGCCTGGACAATGGC-3'<br>Rev : 5'-GTTTCCCTGATTCTGGAAGAGCAGGGGGTTG-3'   |
| A3BnA2       | A3BnA           | For : 5'-CACCATGAATCCACAGATCAGAAATCCG-3'<br>Rev : 5'-GCCATTGTCCAGGCGCTCCACTTCGTAGCACAG-3'      |
|              | A3Bi7           | For : 5'-CTGTGCTACGAAGTGGAGCGCCTGGACAATGGC-3'<br>Rev : 5'-TATAAGGAGGCGCTGCAAATGCTGCGGGATGCT-3' |
| A3BnA3       | A3Bi7           | For : 5'-CACCATGAATCCACAGATCAGAAATCCG-3'<br>Rev : 5'-AGCATCCCGCAGCATTTCAGCGCCTCCTTATA-3'       |
|              | A3BnA           | For : 5'-TATAAGGAGGCGCTGCAAATGCTGCGGGATGCT-3'<br>Rev : 5'-GTTTCCCTGATTCTGGAAGAGCAGGGGGTTG-3'   |
| A3BnA1-2     | A3BnA           | For : 5'-CACCATGAATCCACAGATCAGAAATCCG-3'<br>Rev : 5'-AGCATCCCGCAGCATTTCAGCGCCTCCTTATA-3'       |
|              | A3Bi7           | For : 5'-TATAAGGAGGCGCTGCAAATGCTGCGGGATGCT-3'<br>Rev : 5'-GTTTCCCTGATTCTGGAAGAGCAGGGGGTTG-3'   |
| A3BnA1-3     | A3BnA           | For : 5'-CACCATGAATCCACAGATCAGAAATCCG-3'<br>Rev : 5'-AGCATCCCGCAGCATTTCAGCGCCTCCTTATA-3'       |
|              | A3Bi7           | For : 5'-TATAAGGAGGCGCTGCAAATGCTGCGGGATGCT-3'<br>Rev : 5'-GTTTCCCTGATTCTGGAAGAGCAGGGGGTTG-3'   |
| A3BnA2-3     | A3Bi7           | For : 5'-CACCATGAATCCACAGATCAGAAATCCG-3'<br>Rev : 5'-GCCATTGTCCAGGCGCTCCACTTCGTAGCACAG-3'      |
|              | A3BnA           | For : 5'-CTGTGCTACGAAGTGGAGCGCCTGGACAATGGC-3'<br>Rev : 5'-GTTTCCCTGATTCTGGAAGAGCAGGGGGTTG-3'   |
| A3Bc1        | A3BnA1          | For : 5'-CACCATGGATCCACACATATTCACTTCC-3'<br>Rev : 5'-GTTTCCCTGATTCTGGAAGAGCAGGGGGTTG-3'        |
| A3Bc1-2      | A3BnA1-2        |                                                                                                |
| A3Bc1-3      | A3BnA1-3        |                                                                                                |
| A3Bc2        | A3BnA2          | For : 5'-CACCATGGATCCACACATATTCACTTCC-3'<br>Rev : 5'-GTTTCCCTGATTCTGGAAGAGCAGGGGGTTG-3'        |
| A3Bc2-3      | A3BnA2-3        |                                                                                                |
| A3Bc3        | A3BnA3          |                                                                                                |
| Rhesus-A3B   | Puc57-RhesusA3B | For : 5'-CACCATGAATCCACAGATCAGAAATCCG-3'<br>Rev : 5'-GTTTCCCTGATTCTGGAGAATGGC-3'               |
| Rhesus-A3Bc  | Puc57-RhesusA3B | For : 5'-CACCATGGATCCAGACACGTTCACTTCAA-3'<br>Rev : 5'-GTTTCCCTGATTCTGGAAGAGCAGGGGGTTG-3'       |
| Rhesus-A3Ap2 | Rhesus-A3A      | For : 5'-CACCATGGATCCAAACACGTTCACTTCAAC-3'<br>Rev : 5'-GTTTCCCTGATTCTGGAGAATGGC-3'             |
| A3Ap2HI16DT  | A3A             | For : 5'-CACCATGGATCCAGACACATTCACTT-3'<br>Rev : 5'-GTTTCCCTGATTCTGGAGAATGGC-3'                 |
| A3BcD96H     | A3Bc            | For : 5'-CACCATGGATCCACACACATTCACTT-3'<br>Rev : 5'-GTTTCCCTGATTCTGGAGAAT-3'                    |
| A3BcT97I     | A3Bc            | For : 5'-CACCATGGATCCAGACATATTCACTT-3'<br>Rev : 5'-GTTTCCCTGATTCTGGAGAAT-3'                    |

**Table T1.** Compendium of primers used to generate A3A/A3B chimeras coding sequences for pcDNA3.1 TOPO TA V5 cloning.

| Plasmid         | Matrix              | Primers                                                                                                                           |
|-----------------|---------------------|-----------------------------------------------------------------------------------------------------------------------------------|
| A3BDT196HI      | A3Bi7               | For : 5'-TACCTGATGGATCCAC <b>CACAT</b> ATTCACTTTCACCTTT-3'<br>Rev : 5'-AAAGTTGAAAGTGAAT <b>TATGTG</b> TGGATCCATCAGGTA-3'          |
| A3BF200S        | A3Bi7               | For : 5'-CCAGACACATTCACT <b>TCCA</b> ACTTTAATAATGAC-3'<br>Rev : 5'-GTCATTATTAAGTT <b>GGA</b> AGTGAATGTGTCTGG-3'                   |
| A3BAPLV         | A3Bi7               | For : 5'-TTCAACTTTAATAATGACCTTCGACGGCCAGACC-3'<br>Rev : 5'-GGTCTGGCCCGTCGAAGGTCATTATTAAGTTGAA-3'                                  |
| A3BDPLVLR205GIG | A3Bi7               | For : 5'-TTCAACTTTAATAAT <b>GGCATTGG</b> ACGGCCAGACCTAC-3'<br>Rev : 5'-GTAGTCTGGCCCG <b>TCCAATGCC</b> ATTATTAAGTTGAA-3'           |
| A3BRQ212HK      | A3Bi7<br>A3BDT196HI | For : 5'-TTGGTCCTTCGACGG <b>CATAAG</b> ACCTACTTGTGTAT-3'<br>Rev : 5'-ATAGCACAAAGTAGGT <b>CTTATG</b> CCGTCGAAGGACCAA-3'            |
| A3BWVL228SVK    | A3Bi7               | For : 5'-CTGGACAATGGCAC <b>CTCGGTCA</b> AGATGGACCAGCACATG-3'<br>Rev : 5'-CATGTGCTGGTCCAT <b>CTTGACC</b> GAGGTGCCATTGTCCAG-3'      |
| A3BM235R        | A3Bi7               | For : 5'-CTGATGGACCAGCAC <b>AGGGG</b> CTTTCTATGCAAC-3'<br>Rev : 5'-GTTGCATAGAAAGCC <b>CTGTG</b> CTGGTCCATCAG-3'                   |
| A3BC239H        | A3Bi7               | For : 5'-CACATGGGCTTTCTAC <b>ACA</b> ACGAGGCTAAGAAT-3'<br>Rev : 5'-ATTCTTAGCCTCGTT <b>GTG</b> TAGAAAGCCATGTG-3'                   |
| A3BE241Q        | A3Bi7               | For : 5'-GGCTTTCTATGCAAC <b>CAGG</b> CTAAGAATCTTCTCTGT-3'<br>Rev : 5'-ACAGAGAAGATTCT <b>TAGC</b> CTGGTTGCATAGAAAGCC-3'            |
| A3BCNE239HNQ    | A3Bi7               | For : 5'-CACATGGGCTTTCTAC <b>ACA</b> ACCAGGCTAAGAATCTTCTCTGT-3'<br>Rev : 5'-ACAGAGAAGATTCT <b>TAGC</b> CTGGTTGTGTAGAAAGCCATGTG-3' |
| A3BEY342KH      | A3Bi7               | For : 5'-ACCTACGATGAGTTT <b>AAGCA</b> CTGCTGGGACACCTTT-3'<br>Rev : 5'-AAAGGTGTCCAGCAG <b>TGCTT</b> AAACTCATCGTAGGT-3'             |
| A3BYR350DH      | A3Bi7               | For : 5'-TGGGACACCTTTGTGG <b>ACCACC</b> CAGGGATGTCCCTTC-3'<br>Rev : 5'-GAAGGGACATCCCTGG <b>TGGT</b> CCACAAGGTGTCCCA-3'            |
| A3BE363D        | A3Bi7               | For : 5'-CCCTGGGATGGACTAG <b>ATG</b> AGCACAGCCAAGCC-3'<br>Rev : 5'-GGCTTGGCTGTGCT <b>CATC</b> TAGTCCATCCCAGGG-3'                  |
| A3BcR212H       | A3Bc                | For : 5'-TTGGTCCTTCGACGG <b>CATCAG</b> ACCTACTTGTGTAT-3'<br>Rev : 5'-ATAGCACAAAGTAGGT <b>CTGATG</b> CCGTCGAAGGACCAA-3'            |
| A3BcQ213K       | A3Bc                | For : 5'-TTGGTCCTTCGACGG <b>CGCAAG</b> ACCTACTTGTGTAT-3'<br>Rev : 5'-ATAGCACAAAGTAGGT <b>CTTGCG</b> CCGTCGAAGGACCAA-3'            |

**Table T2.** Compendium of primers used for site directed mutagenesis on A3B expression plasmids.
